# Supplementary material for: The Cystic Fibrosis Transmembrane Conductance Regulator Gene (CFTR) Is under Post-Transcriptional Control of microRNAs: Analysis of the Effects of agomiRNAs Mimicking miR-145-5p, miR-101-3p, and miR-335-5p
Source: Noncoding RNA. 2023 Apr 18;9(2):29. doi: 10.3390/ncrna9020029 (PMC10146138; doi:10.3390/ncrna9020029)
Supplement: Supplementary file 1 [file ncrna-09-00029-s001.zip › ncrna-2296740-supplementary.pdf]

# **The Cystic Fibrosis Transmembrane Conductance Regulator Gene (CFTR) is under post-transcriptional control of microRNAs: analysis of the effects of agomiRNAs mimicking miR-145-5p, miR-101-3p, and miR-335-5p**

**Chiara Papi <sup>1</sup>, Jessica Gasparello <sup>1</sup>, Matteo Zurlo <sup>1</sup>, Lucia Carmela Cosenza <sup>1</sup>, Roberto Gambari <sup>1,2 \*</sup>  
and Alessia Finotti <sup>1,2 \*</sup>**

<sup>1</sup> Department of Life Sciences and Biotechnology, University of Ferrara, Italy

<sup>2</sup> Research Center on Innovative Therapies for Cystic Fibrosis, University of Ferrara, Italy

\* Correspondence: [alessia.finotti@unife.it](mailto:alessia.finotti@unife.it) (A.F.); [gam@unife.it](mailto:gam@unife.it) (R.G.)  
Tel.: +39-0532-974510 (A.F.); +39-0532-974443 (R.G.)

## **SUPPLEMENTARY MATERIALS**

# FIGURE S1

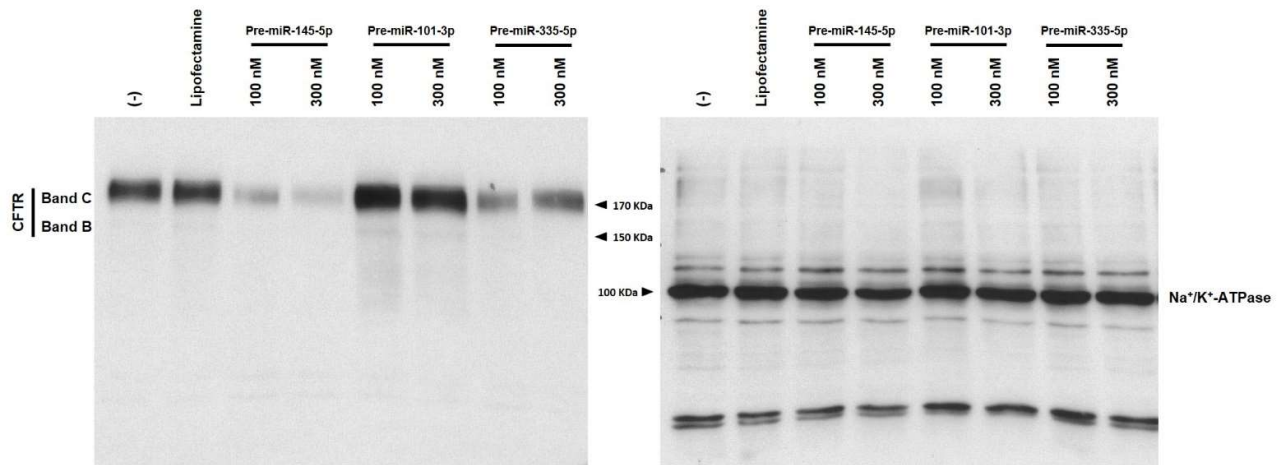

**Supplementary Figure S1.** Uncut version of the Western blotting gels used for data reported in Figure 2, upper part of the panel (CFTR) and Figure 2, lower part of the panel (Na<sup>+</sup>/K<sup>+</sup>-ATPase).

## FIGURE S2

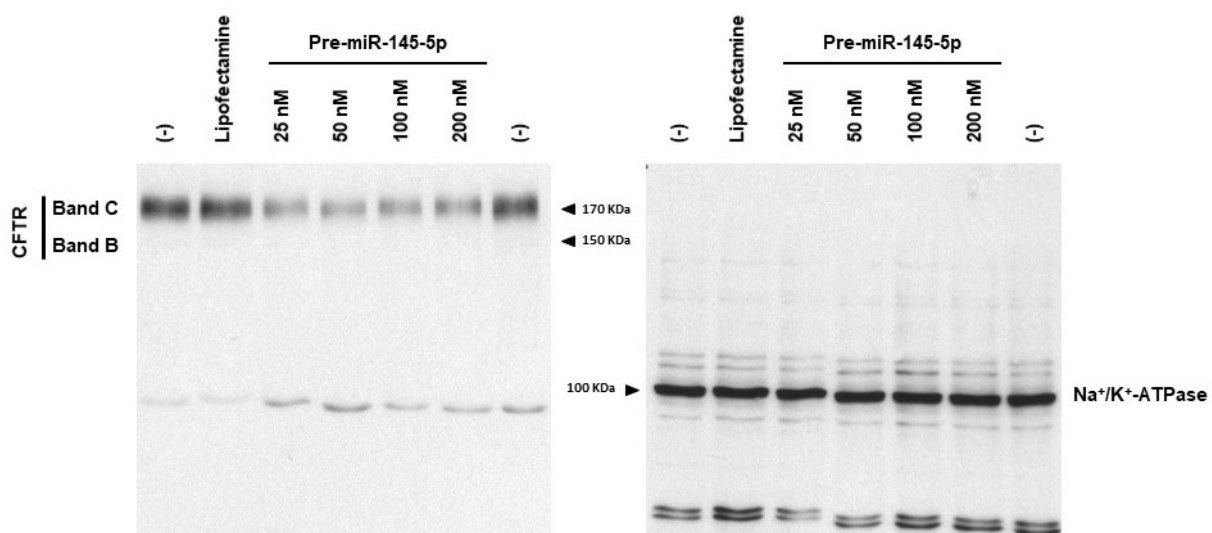

**Supplementary Figure S2.** Uncut version of the Western blotting gels used for data reported in Figure 3B and Figure 3C.

## FIGURE S3

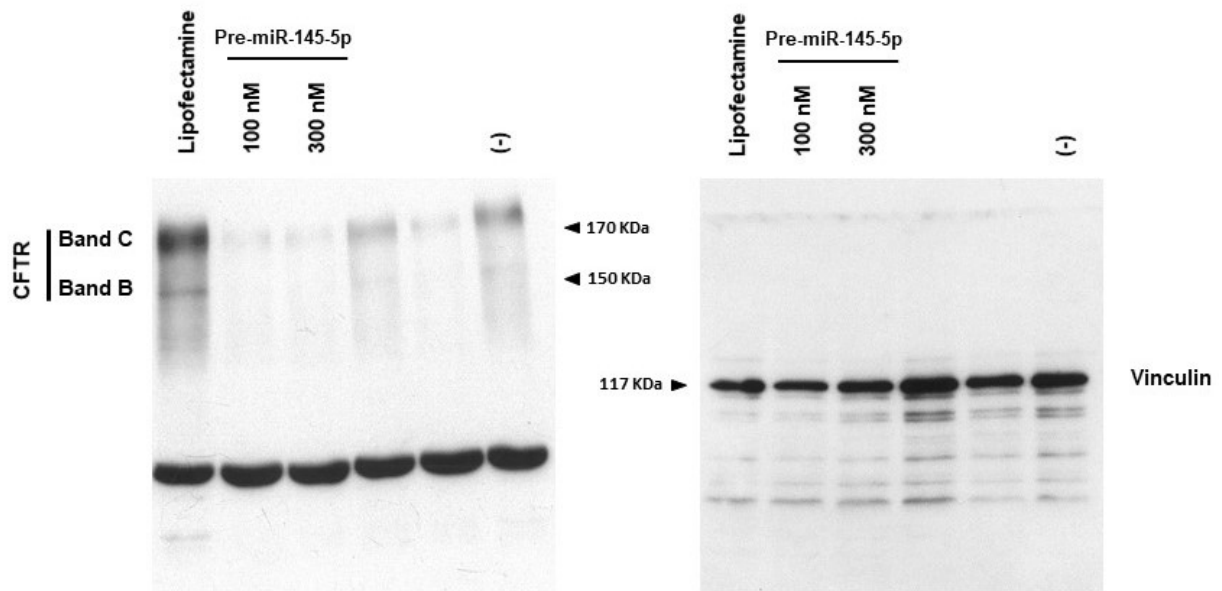

**Supplementary Figure S3.** Uncut version of the Western blotting gels used for data reported in panels B and C of Figure 5.
